# Supplementary material
Source: Springer Nature journal article supplement (https://www.springermedizin.de/resource/supplementary/12947_2007_179_MOESM6_ESM.pdf/9556398)

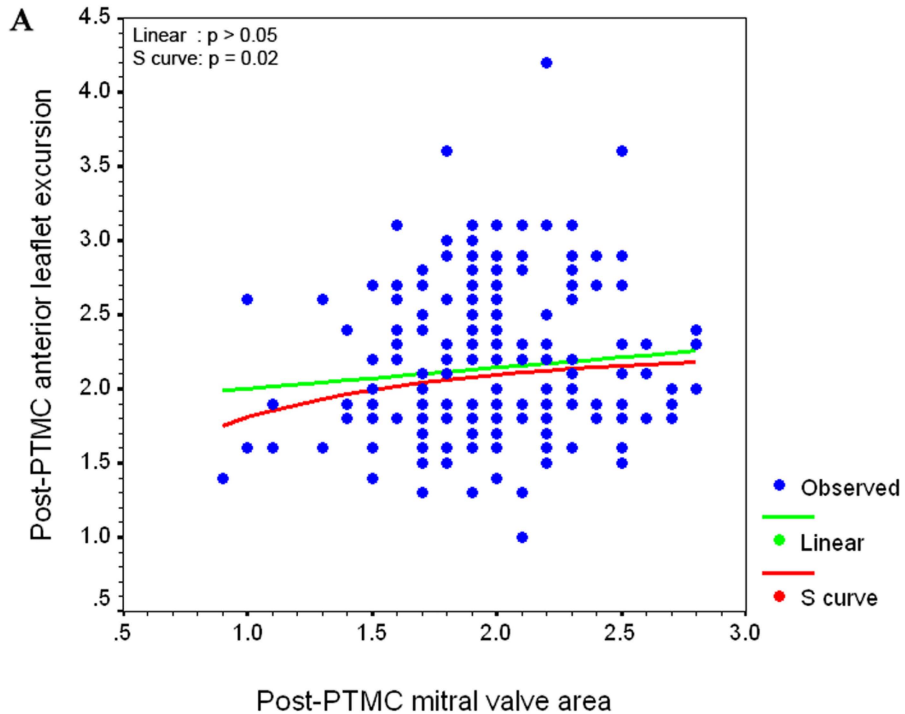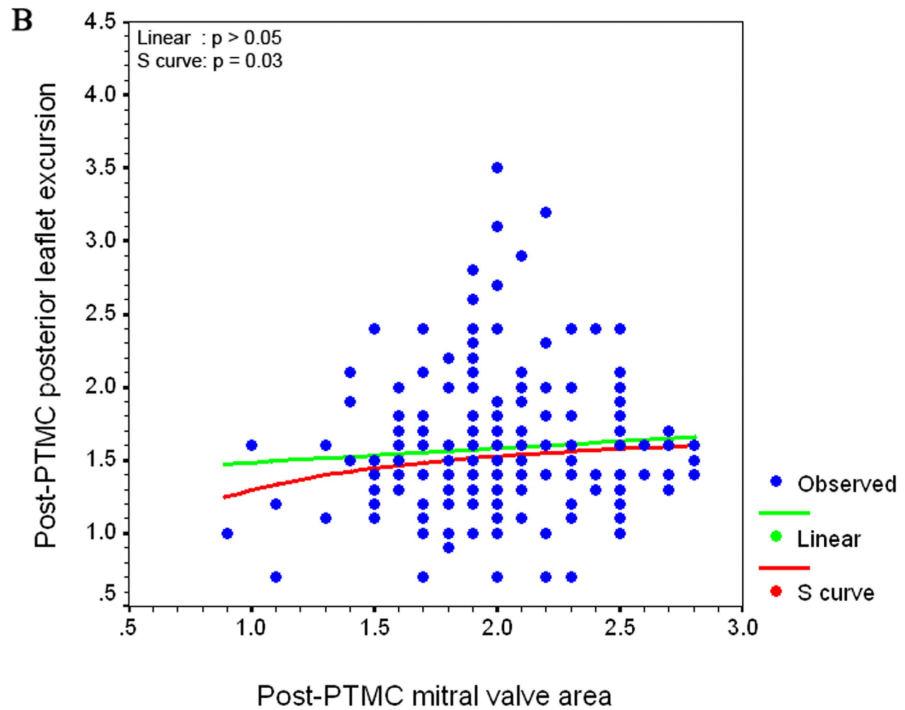

Supplement: MOESM6 [file 9556398]
